# Supplementary material for: A 3-Component Mixture of Rayleigh Distributions: Properties and Estimation in Bayesian Framework
Source: PLoS One. 2015 May 20;10(5):e0126183. doi: 10.1371/journal.pone.0126183 (PMC4439070; doi:10.1371/journal.pone.0126183)
Supplement: S2 Table — (DOCX) [file pone.0126183.s004.docx]

Table S2: Limiting expressions for the Bayes estimators as using the ICP and the SRIGP under SELF.

| Parameters | Bayes Estimators | |
| --- | --- | --- |
| ICP | SRIGP |
|  |  |  |
|  |  |  |
|  |  |  |
|  |  |  |
|  |  |  |
